# Supplementary material
Source: ML conference proceedings conference paper supplement (https://proceedings.neurips.cc/paper_files/paper/2023/hash/09723c9f291f6056fd1885081859c186-Abstract.html)
Supplement: Supplementary file 1 [file 09723c9f291f6056fd1885081859c186-Supplemental-Datasets_and_Benchmarks.pdf]

## A Appendix

### A.1 Code availability

The code for the illustrative use cases are available on GitHub <https://github.com/vanderschaarlab/synthcity-benchmarking>. The synthcity library is available on pip and GitHub. The tutorials folder contains additional illustrative examples.

### A.2 Supported algorithms and metrics

| Aspect   | Evaluation Metric \ Software | Synthcity | YData | Gretel | SDV | DataSynthesizer | SmartNoise | nbsynthetic |
|----------|------------------------------|-----------|-------|--------|-----|-----------------|------------|-------------|
| Fidelity | Jensen-Shannon distance      | ✓         |       |        |     |                 |            |             |
|          | Wasserstein distance         | ✓         |       |        |     |                 |            |             |
|          | Total variation distance     |           |       |        | ✓   |                 |            |             |
|          | KL divergence                | ✓         |       |        |     |                 |            |             |
|          | Skewness                     |           |       |        | ✓   |                 |            |             |
|          | Max-mean discrepancy         | ✓         |       |        |     |                 |            | ✓           |
|          | KS test                      | ✓         |       |        | ✓   |                 |            | ✓           |
|          | PRDC                         | ✓         |       |        |     |                 |            |             |
|          | Alpha-precision              | ✓         |       |        |     |                 |            |             |
|          | Survival Kaplan-Meier dist.  | ✓         |       |        |     |                 |            |             |
|          | Detection: linear            | ✓         |       |        | ✓   |                 |            |             |
|          | Detection: NN                | ✓         |       |        |     |                 |            |             |
|          | Detection: XGB               | ✓         |       |        |     |                 |            |             |
|          | Detection: Linear            |           |       |        | ✓   |                 |            |             |
| Utility  | Linear model                 | ✓         |       |        | ✓   |                 |            |             |
|          | MLP                          | ✓         |       |        | ✓   |                 |            |             |
|          | XGBoost                      | ✓         |       |        | ✓   |                 |            |             |
|          | Static survival              | ✓         |       |        |     |                 |            |             |
|          | Time-series                  | ✓         |       |        |     |                 |            |             |
|          | Survival time-series         | ✓         |       |        |     |                 |            |             |
| Privacy  | Correct attribution prob.    | ✓         |       |        | ✓   |                 |            |             |
|          | K-anonymity                  | ✓         |       |        |     |                 |            |             |
|          | K-map                        | ✓         |       |        |     |                 |            |             |
|          | Delta-presence               | ✓         |       |        |     |                 |            |             |
|          | L-diversity                  | ✓         |       |        |     |                 |            |             |
|          | DOMIAS                       | ✓         |       |        |     |                 |            |             |
|          | Identifiability score        | ✓         |       |        |     |                 |            |             |

Table 6: The evaluation metrics supported by synthcity and other open source synthetic data libraries. Comparisons are based on the software versions available at the time of writing.

| Static           | Censored               | Time Series       |
|------------------|------------------------|-------------------|
| Fully connected  | Weibull AFT            | LSTM              |
| Residual network | Cox PH                 | GRU               |
| TabNet           | Random Survival Forest | RNN               |
|                  | Survival Xgboost       | Transformer       |
|                  | Deephit                | MLSTM_FCN         |
|                  | Tenn                   | TCN               |
|                  | Date                   | InceptionTime     |
|                  |                        | InceptionTimePlus |
|                  |                        | XceptionTime      |
|                  |                        | ResCNN            |
|                  |                        | OmniScaleCNN      |
|                  |                        | XCM               |

Table 7: Available network architectures and survival models in synthcity for different data modalities. These components are compatible with multiple algorithms.

| Algorithm \Software | Synthcity | YData | Gretel | SDV | DataSynthesizer | SmartNoise | nbsynthetic |
|---------------------|-----------|-------|--------|-----|-----------------|------------|-------------|
| TabDDPM             | ✓         |       |        |     |                 |            |             |
| ARF                 | ✓         |       |        |     |                 |            |             |
| GOGGLE              | ✓         |       |        |     |                 |            |             |
| CTGAN               | ✓         | ✓     |        | ✓   |                 |            | ✓           |
| ACTGAN              |           |       | ✓      |     |                 |            |             |
| TVAE                | ✓         |       |        | ✓   |                 |            |             |
| Bayesian Network    | ✓         |       |        |     |                 |            |             |
| Normalizing Flows   | ✓         |       |        |     |                 |            |             |
| Survial GAN         | ✓         |       |        |     |                 |            |             |
| Survival VAE        | ✓         |       |        |     |                 |            |             |
| DoppelGANger        |           |       | ✓      |     |                 |            |             |
| TimeGAN             | ✓         | ✓     |        |     |                 |            |             |
| FourierFlows        | ✓         |       |        |     |                 |            |             |
| Probabilistic AR    | ✓         |       |        | ✓   |                 |            |             |
| DECAF               | ✓         |       |        |     |                 |            |             |
| RadialGAN           | ✓         |       |        |     |                 |            |             |
| ADSGAN              | ✓         |       |        |     |                 |            |             |
| DPGAN               | ✓         |       | ✓      |     |                 | ✓          |             |
| PATEGAN             | ✓         |       |        |     |                 | ✓          |             |
| PrivBayes           | ✓         |       |        |     | ✓               |            |             |

Table 8: The data generating algorithms supported by synthcity and other open source synthetic data libraries. Comparisons are based on the software versions available at the time of writing.
